# Supplementary material
Source: Elsevier journal article supplement (https://www.sciencedirect.com/science/article/pii/S0213911119302122)
Supplement: mmc1 [file S0213911119302122:mmc1.docx]

# Apéndice

# Tabla I

# Características de las encuestas empleadasa

| **Características de la encuesta** | **Bolivia** | **Colombia** | **Perú** |
| --- | --- | --- | --- |
| Población de estudio | Mujeres en edad fértil (no especifica), niños menores de 5 años, y hombres de 15 a 64 años que viven en el hogar | Hogares y sus miembros, mujeres en edad fértil (13 a 49 años), su esposo o compañero, hijos menores de 5 años, personas de 60 años en adelante | Hogares y sus miembros, mujeres en edad fértil (15 a 49 años), niños menores de 5 años |
| Diseño muestral | Muestra probabilística, por conglomerados, estratificada y bietápica | Muestra probabilística, de conglomerados, estratificada y polietápica. Se excluyeron poblaciones rurales de los departamentos de Amazonía y Orinoquia por motivos de costos | Muestra probabilística, de áreas, estratificada, bietápica e independiente por departamentos. |
| Nivel de inferencia | Nacional, urbano y rural, región Altiplano, Valle y Llano, nueve departamentos de Bolivia | Nacional, urbano y rural, seis regiones (Caribe, Oriental, Central, Bogotá, Pacífica y Amazonía-Orinoquia), 16 subregiones y todos los departamentos de Colombia | Nacional, urbano y rural, región Costa, Sierra, Selva y Lima metropolitana, 24 departamentos de Perú |
| Instituciones participantes | Instituto Nacional de Estadística (INE), Ministerio de Salud y Deportes, USAID, Banco Mundial, PNUD, entre otros | Departamento Administrativo Nacional de Estadística (DANE), Ministerio de Salud y Protección Social, UNICEF, USAID, PROFAMILIA, entre otros | Instituto Nacional de Estadística e Informática (INEI), Ministerio de Salud, USAID, entre otros |
| Método de entrevista | Entrevista directa | Entrevista directa asistida por computador | Entrevista directa por personal capacitado usando un equipo PDA (asistente digital personal) |
| Consentimiento informado | Ante procedimiento de recolección de muestra de sangre se da lectura a un consentimiento; aunque no existe consentimiento para mediciones antropométricas siempre es posible rechazar el procedimiento | Se da lectura a un consentimiento informado para cada procedimiento incluido en la encuesta, esto incluye recolección de muestras de sangre y mediciones antropométricas | Se da lectura a un consentimiento informado para el procedimiento de recolección de muestras de sangre y mediciones antropométricas |
| aLa información recolectada proviene tanto de documentación de las encuestas como de manuales de encuestador. | | | |

# Tabla II

# Población no incluida en el estudio

| **Características** | **Bolivia** | | | | **p** | **Colombia** | | | | **p** | **Perú** | | | | **p** | |
| --- | --- | --- | --- | --- | --- | --- | --- | --- | --- | --- | --- | --- | --- | --- | --- | --- |
| **n** | **Incluida** | **n** | **No incluida** | **n** | **Incluida** | **n** | **No incluida** | **n** | **Incluida** | **n** | **No incluida** |
| **(%)** | **(%)** | **(%)** | **(%)** | **(%)** | **(%)** |
| *Lactancia* |  |  |  |  |  |  |  |  |  |  |  |  |  |  |  |
| Lactancia materna <6 meses | 174 | 10,1 | 32 | 8,3 | 0,363 | 1093 | 26,1 | 296 | 70,4 | 0,0783 | 142 | 7,2 | 26 | 11,9 | 0,06 |
| Lactancia materna ≥6 meses | 1512 | 89,9 | 1260 | 91,7 | 3236 | 73,9 | 2920 | 29,6 | 2428 | 92,8 | 1434 | 88,1 |
| *Edad del niño en meses (media ± DE)* | 1686 | 39,7 ± 10,2 | 1292 | 39,7 ± 10,7 |  | 4329 | 40,8 ± 10,4 | 3216 | 39,8 ± 10,5 |  | 2570 | 40,6 ± 11,3 | 1460 | 40,4 ± 10,6 |  |
| *Sexo del niño* |  |  |  |  |  |  |  |  |  |  |  |  |  |  |  |
| Femenino | 816 | 49,6 | 624 | 48,1 | 0,5075 | 2114 | 49,2 | 1559 | 48,7 | 0,7384 | 1328 | 50 | 719 | 50 | 0,84 |
| Masculino | 870 | 50,4 | 668 | 51,9 | 2215 | 50,8 | 1657 | 51,3 | 1242 | 50 | 741 | 50 |
| *Estado nutricional del niño* |  |  |  |  |  |  |  |  |  |  |  |  |  |  |  |
| Normal | 981 | 56,3 | 688 | 61 | 0,011 | 3239 | 73,6 | 2083 | 75,6 | 0,102 | 1800 | 66,92 | 859 | 60,78 | 0,375 |
| Sobrepeso | 537 | 33,3 | 337 | 28,1 | 884 | 21,5 | 511 | 19,3 | 631 | 26,48 | 375 | 31,03 |
| Obesidad | 168 | 10,4 | 128 | 10,9 | 206 | 4,9 | 135 | 5,1 | 139 | 6,6 | 104 | 8,18 |
| *Edad de la madre en años (media ± DE)* | 1686 | 31,1 ± 7,1 | 1292 | 30,7 ± 7,2 |  | 4329 | 29,7 ± 6,8 | 3216 | 28,8 ± 7,0 |  | 2570 | 30,9 ± 7,1 | 1460 | 30,8 ± 6,7 |  |
| *Nivel de educación de la madre* |  |  |  |  |  |  |  |  |  |  |  |  |  |  |  |
| Sin educación | 92 | 5,8 | 83 | 6,8 | 0,0933 | 87 | 1,5 | 83 | 2 | 0,3068 | 102 | 3,5 | 47 | 2,6 | 0,01 |
| Primaria | 854 | 51,4 | 606 | 46,9 | 1280 | 24,5 | 916 | 24,1 | 1013 | 34,9 | 393 | 24,1 |
| Secundaria | 490 | 29 | 372 | 29 | 2195 | 53,7 | 1617 | 52,2 | 1053 | 43,5 | 592 | 41,1 |
| Superior | 250 | 13,8 | 231 | 17,3 | 767 | 20,3 | 600 | 21,7 | 402 | 18,1 | 428 | 32,2 |
| *IMC categorizado* |  |  |  |  |  |  |  |  |  |  |  |  |  |  |  |
| Normal | 724 | 42,3 | 464 | 38,2 | 0,064 | 2156 | 51,9 | 1205 | 47,4 | 0,0219 | 1132 | 43,7 | 536 | 39,6 | 0,0058 |
| Sobrepeso | 622 | 37 | 518 | 42 | 1460 | 33,4 | 931 | 36,6 | 1025 | 41,2 | 555 | 39,9 |
| Obesidad | 340 | 20,7 | 233 | 19,8 | 713 | 14,7 | 451 | 16 | 413 | 15,1 | 292 | 20,5 |
| *Estado civil de la madre* |  |  |  |  |  |  |  |  |  |  |  |  |  |  |  |
| Casada | 858 | 52,2 | 617 | 51,2 | 0,3231 | 989 | 24,2 | 572 | 19,96 | 0,005 | 809 | 31,44 | 455 | 31,34 | 0,6705 |
| Nunca casada | 110 | 6,1 | 90 | 6,44 | 371 | 9,42 | 302 | 11,24 | 130 | 4,9 | 74 | 5,47 |
| Viven juntos | 576 | 32,6 | 462 | 35,2 | 2309 | 50,07 | 1734 | 53 | 1387 | 52,97 | 766 | 51,07 |
| No viven juntos | 142 | 9,1 | 81 | 7,2 | 660 | 16,29 | 509 | 15,8 | 244 | 10,65 | 152 | 12,12 |
| *Índice de riqueza* |  |  |  |  |  |  |  |  |  |  |  |  |  |  |  |
| 1 (el más bajo) | 342 | 19,9 | 10 | 38,7 | 0,1566 | 1415 | 19,77 | 60 | 27,16 | 0,2489 | 580 | 20,45 | 8 | 15,59 | 0,7283 |
| 2 | 344 | 20,1 | 3 | 12 | 899 | 19,95 | 32 | 21,46 | 530 | 19,91 | 5 | 16,82 |
| 3 | 325 | 19,8 | 7 | 24,2 | 779 | 20,1 | 27 | 17,91 | 545 | 20,06 | 5 | 23,86 |
| 4 | 333 | 20,1 | 7 | 18,4 | 676 | 20,16 | 25 | 20,8 | 484 | 20,06 | 7 | 13,84 |
| 5 (el más alto) | 342 | 20,1 | 3 | 6,7 | 560 | 20,01 | 15 | 12,67 | 431 | 19,52 | 5 | 29,89 |
| *Lugar de residencia* |  |  |  |  |  |  |  |  |  |  |  |  |  |  |  |
| Urbano | 944 | 58,2 | 766 | 63,1 | 0,0378 | 2929 | 75,22 | 2181 | 73,88 | 0,3008 | 1342 | 62,26 | 955 | 75,19 | 0,001 |
| Rural | 742 | 41,8 | 526 | 36,9 | 1400 | 24,78 | 1035 | 26,12 | 1228 | 37,74 | 505 | 24,81 |

DE: desviación estándar; IMC: índice de masa corporal.

**Tabla III**

*Odds ratios* ajustadas e intervalos de confianza del 95% para sobrepeso y obesidad en niños y niñas que lactaron ≥6 meses, estratificado por edad del/de la niño/aa

| **Bolivia (1703)** | | | | | | | | |
| --- | --- | --- | --- | --- | --- | --- | --- | --- |
| **Lactancia** | **Edad** **≤42 meses** | | | | **Edad >42 meses** | | | |
| **n** | **Sobrepeso (IC95%)** | **n** | **Obesidad (IC95%)** | **n** | **Sobrepeso (IC95%)** | **n** | **Obesidad (IC95%)** |
| Lactancia materna <6 meses | 583 | Ref. | 583 | Ref. | 414 | Ref. | 414 | Ref. |
| Lactancia materna ≥6 meses | 327 | 0,52 (0,28-0,96) | 114 | 0,28 (0,12-0,67) | 211 | 1,22 (0,60-2,48) | 54 | 0,28 (0,12-0,66) |
| **Colombia (4453)** | | | | | | | | |
| **Lactancia** | **Edad ≤42 meses** | | | | **Edad >42 meses** | | | |
| n | **Sobrepeso (IC95%)** | **n** | **Obesidad (IC95%)** | **n** | **Sobrepeso (IC95%)** | **n** | **Obesidad (IC95%)** |
| Lactancia materna <6 meses | 1828 | Ref. | 1828 | Ref. | 1520 | Ref. | 1520 | Ref. |
| Lactancia materna ≥6 meses | 562 | 0,91 (0,69-1,20) | 116 | 0,65 (0,37-1,14) | 335 | 0,95 (0,66-1,36) | 92 | 0,74 (0,40-1,35) |
| **Perú (2583)** | | | | | | | | |
| **Lactancia** | **Edad ≤42 meses** | | | | **Edad >42 meses** | | | |
| n | **Sobrepeso (IC95%)** | **n** | **Obesidad (IC95%)** | **n** | **Sobrepeso (IC95%)** | **n** | **Obesidad (IC95%)** |
| Lactancia materna <6 meses | 970 | Ref. | 970 | Ref. | 841 | Ref. | 841 | Ref. |
| Lactancia materna ≥6 meses | 377 | 1,09 (0,55-2,15) | 82 | 0,53 (0,19-1,50) | 256 | 0,36 (0,15-0,86) | 58 | 0,39 (0,12-1,33) |

IC95%: intervalo de confianza del 95%; Ref.: categoría de referencia.

aLos modelos crudos y ajustados estiman las razones de prevalencias en cada país, y toman como categoría de referencia al grupo de niños con peso normal, tanto para sobrepeso como para obesidad. Se incluyen los controles discutidos en el apartado de variables confusoras (ver sección de Método): edad y sexo del niño; edad, nivel de educación, estado nutricional y estado civil de la madre; índice de riqueza y lugar de residencia.
